# Supplementary material for: Multi-omics signatures of alcohol use disorder in the dorsal and ventral striatum
Source: PubMed Central journal article supplement (PMC9076849; doi:10.1038/s41398-022-01959-1), 2022-05-06

### A) Caudate Nucleus

$$\lambda = 1.78$$

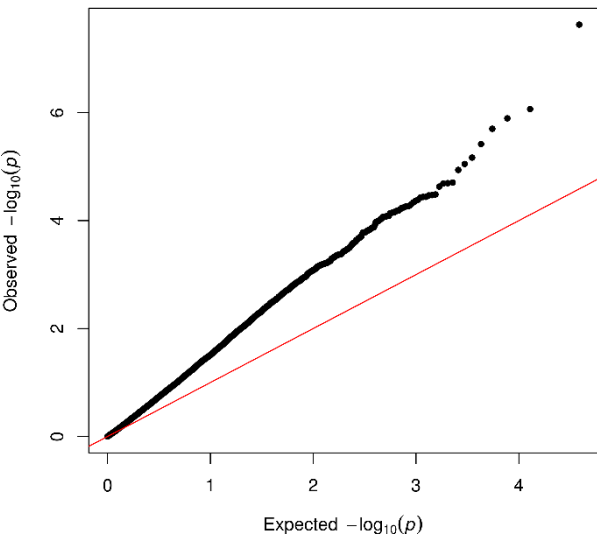

### B) Putamen

$$\lambda = 1.63$$

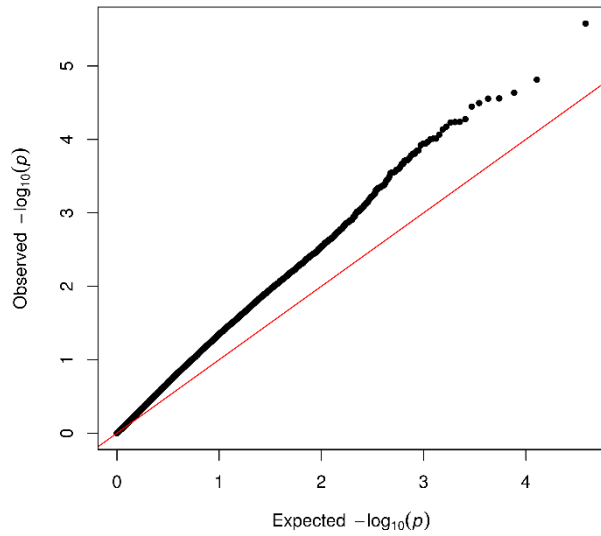

### C) Ventral Striatum

$$\lambda = 1.22$$

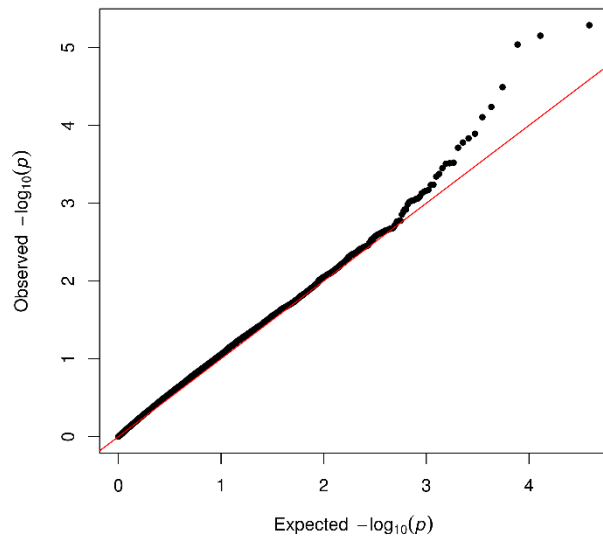

Supplement: 41398_2022_1959_MOESM2_ESM.pdf [file 41398_2022_1959_MOESM2_ESM.pdf]
