# Supplementary material for: Multi-omics signatures of alcohol use disorder in the dorsal and ventral striatum
Source: PubMed Central journal article supplement (PMC9076849; doi:10.1038/s41398-022-01959-1), 2022-05-06

A.1 Caudate Nucleus - Expression

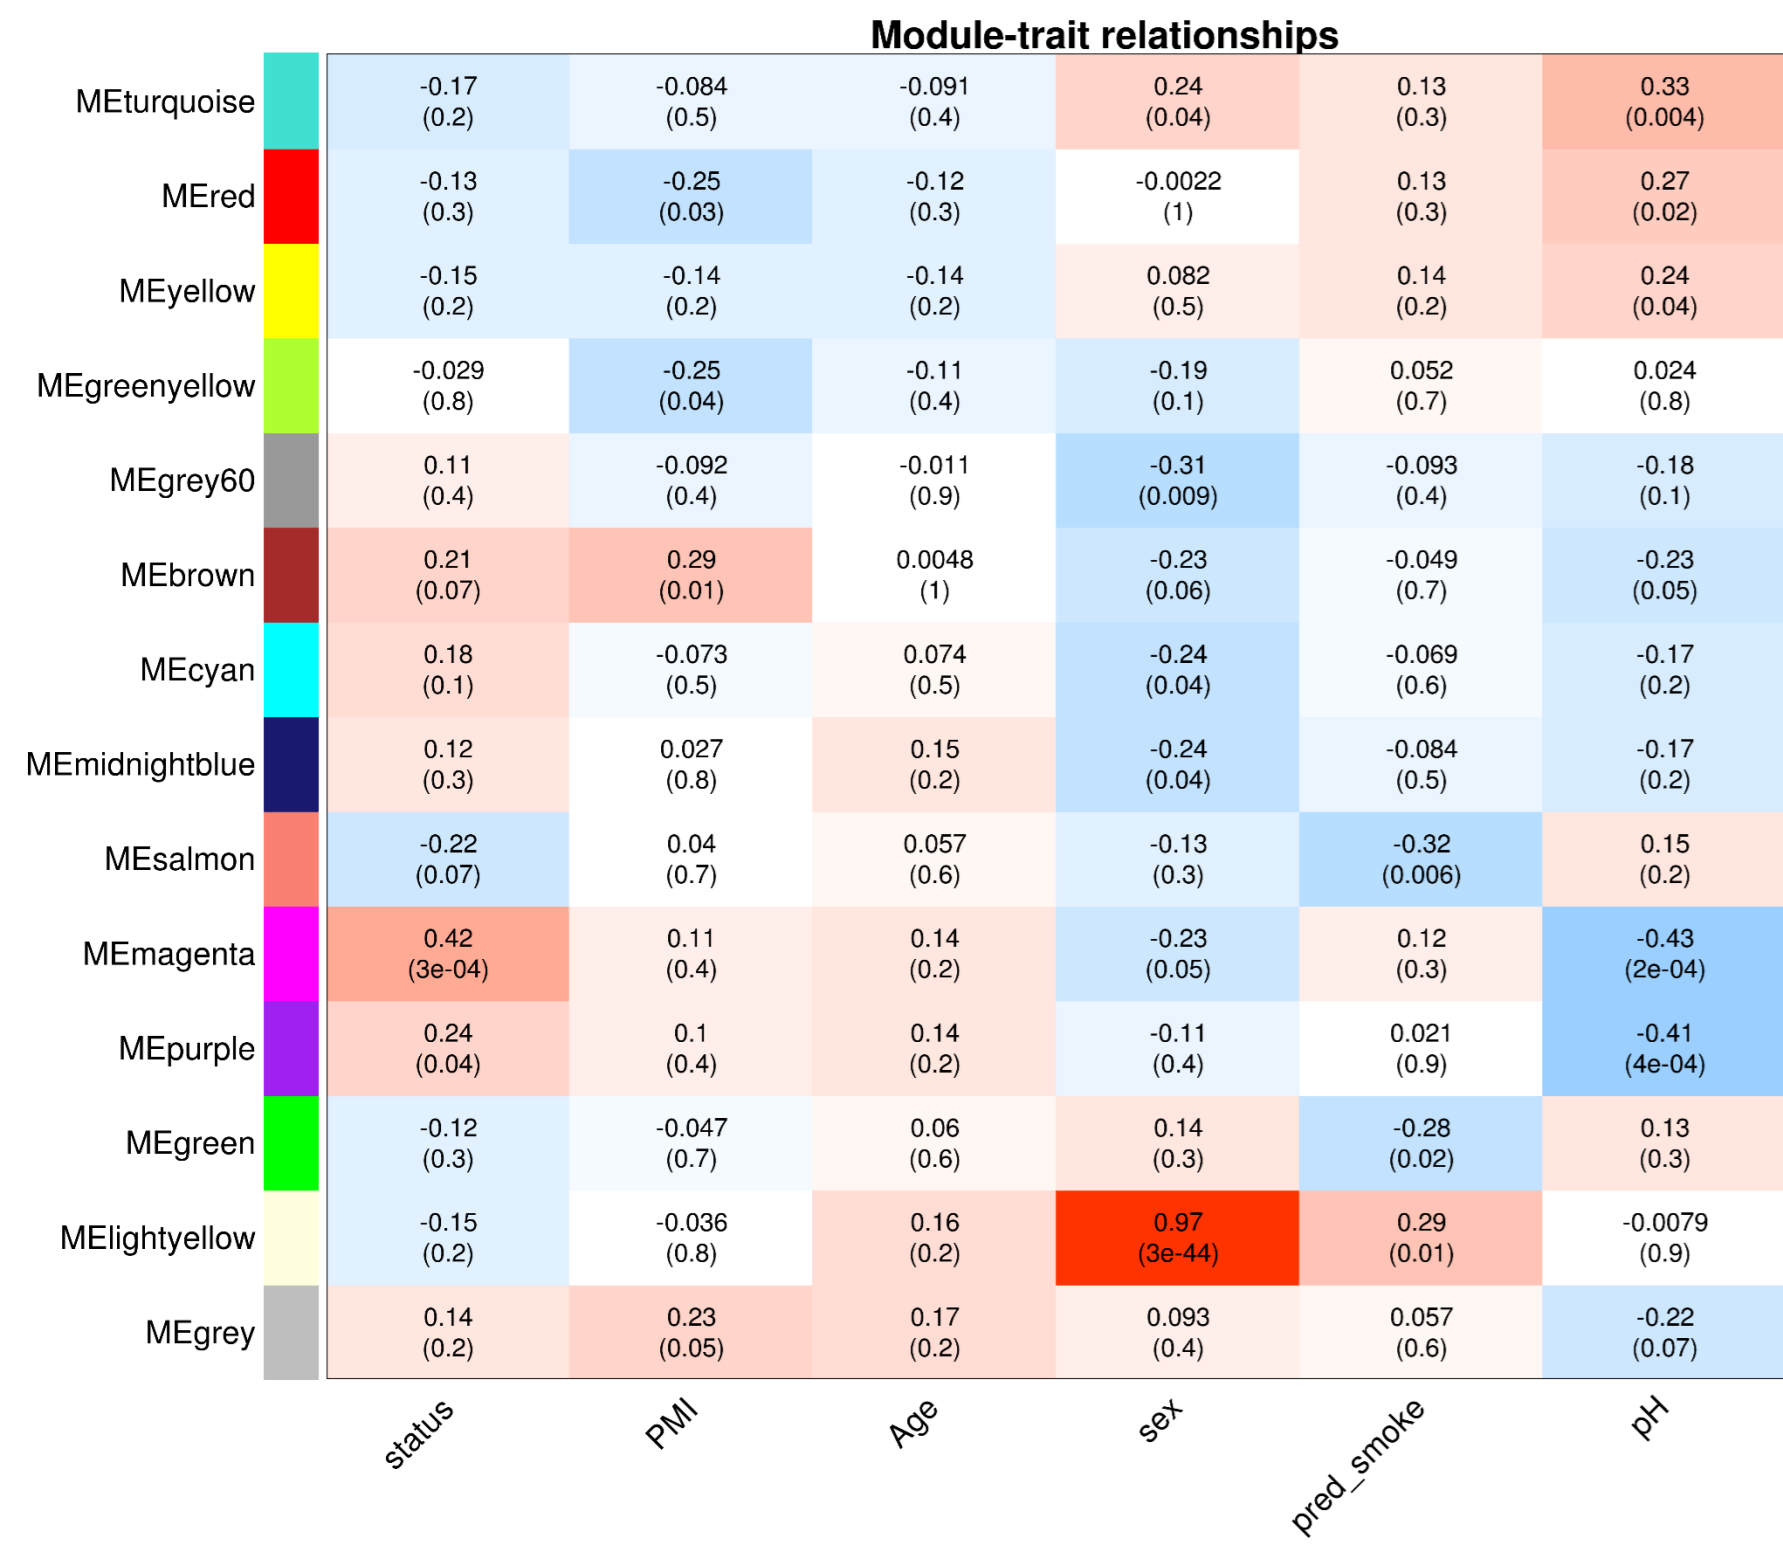

B.1 Putamen - Expression

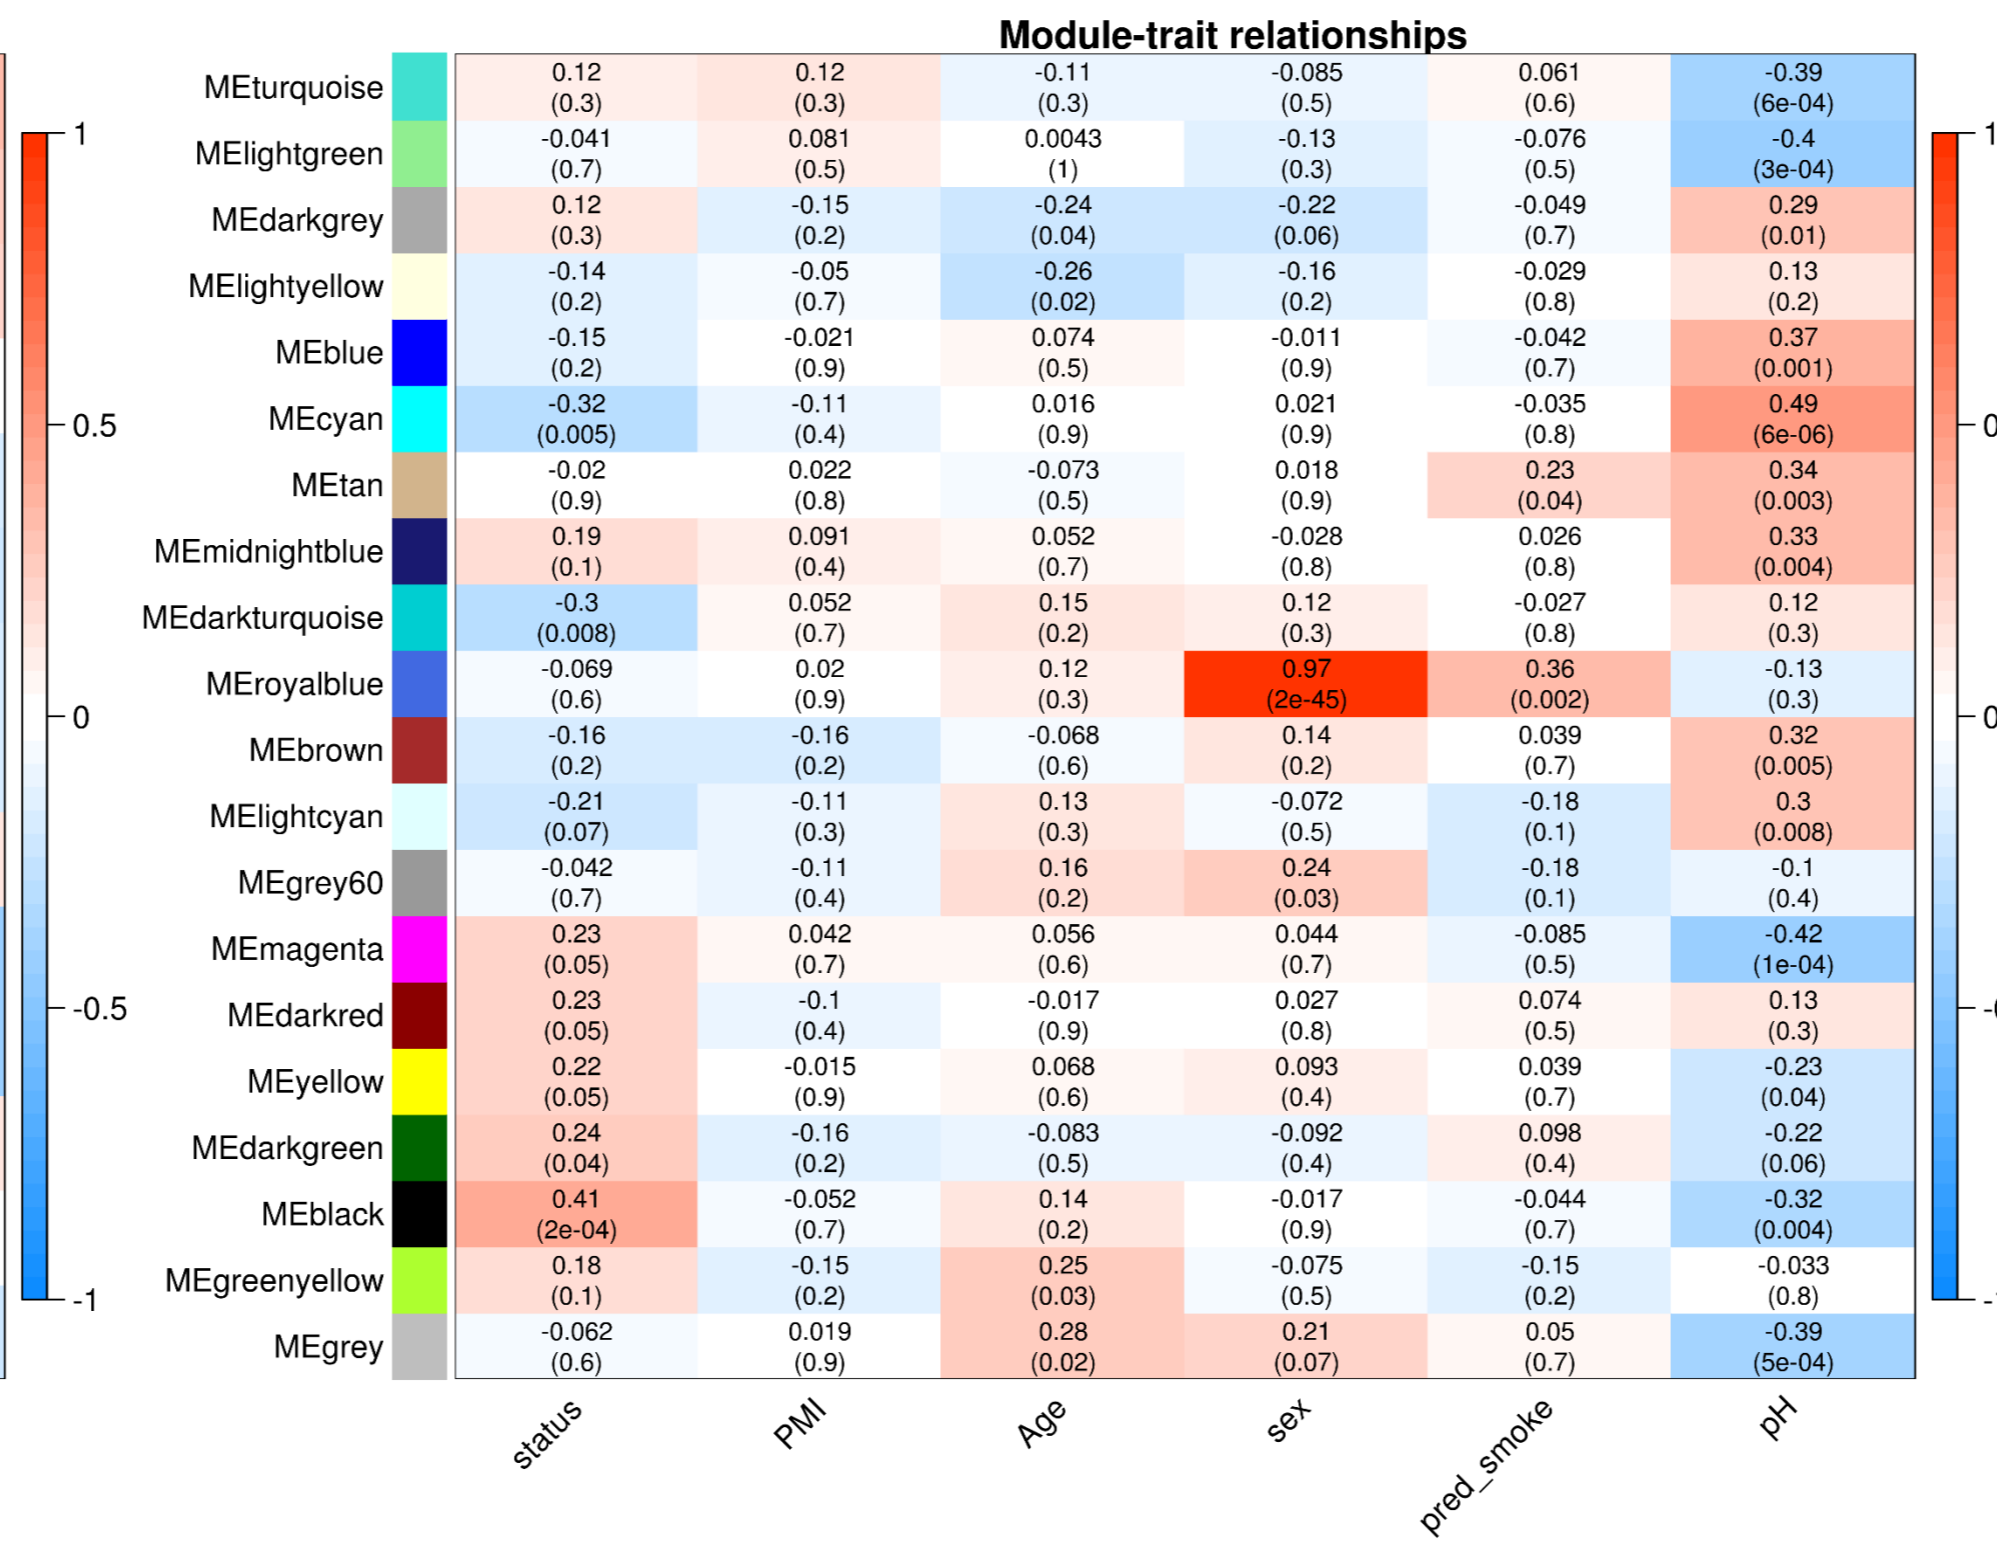

C.1 Ventral Striatum - Expression

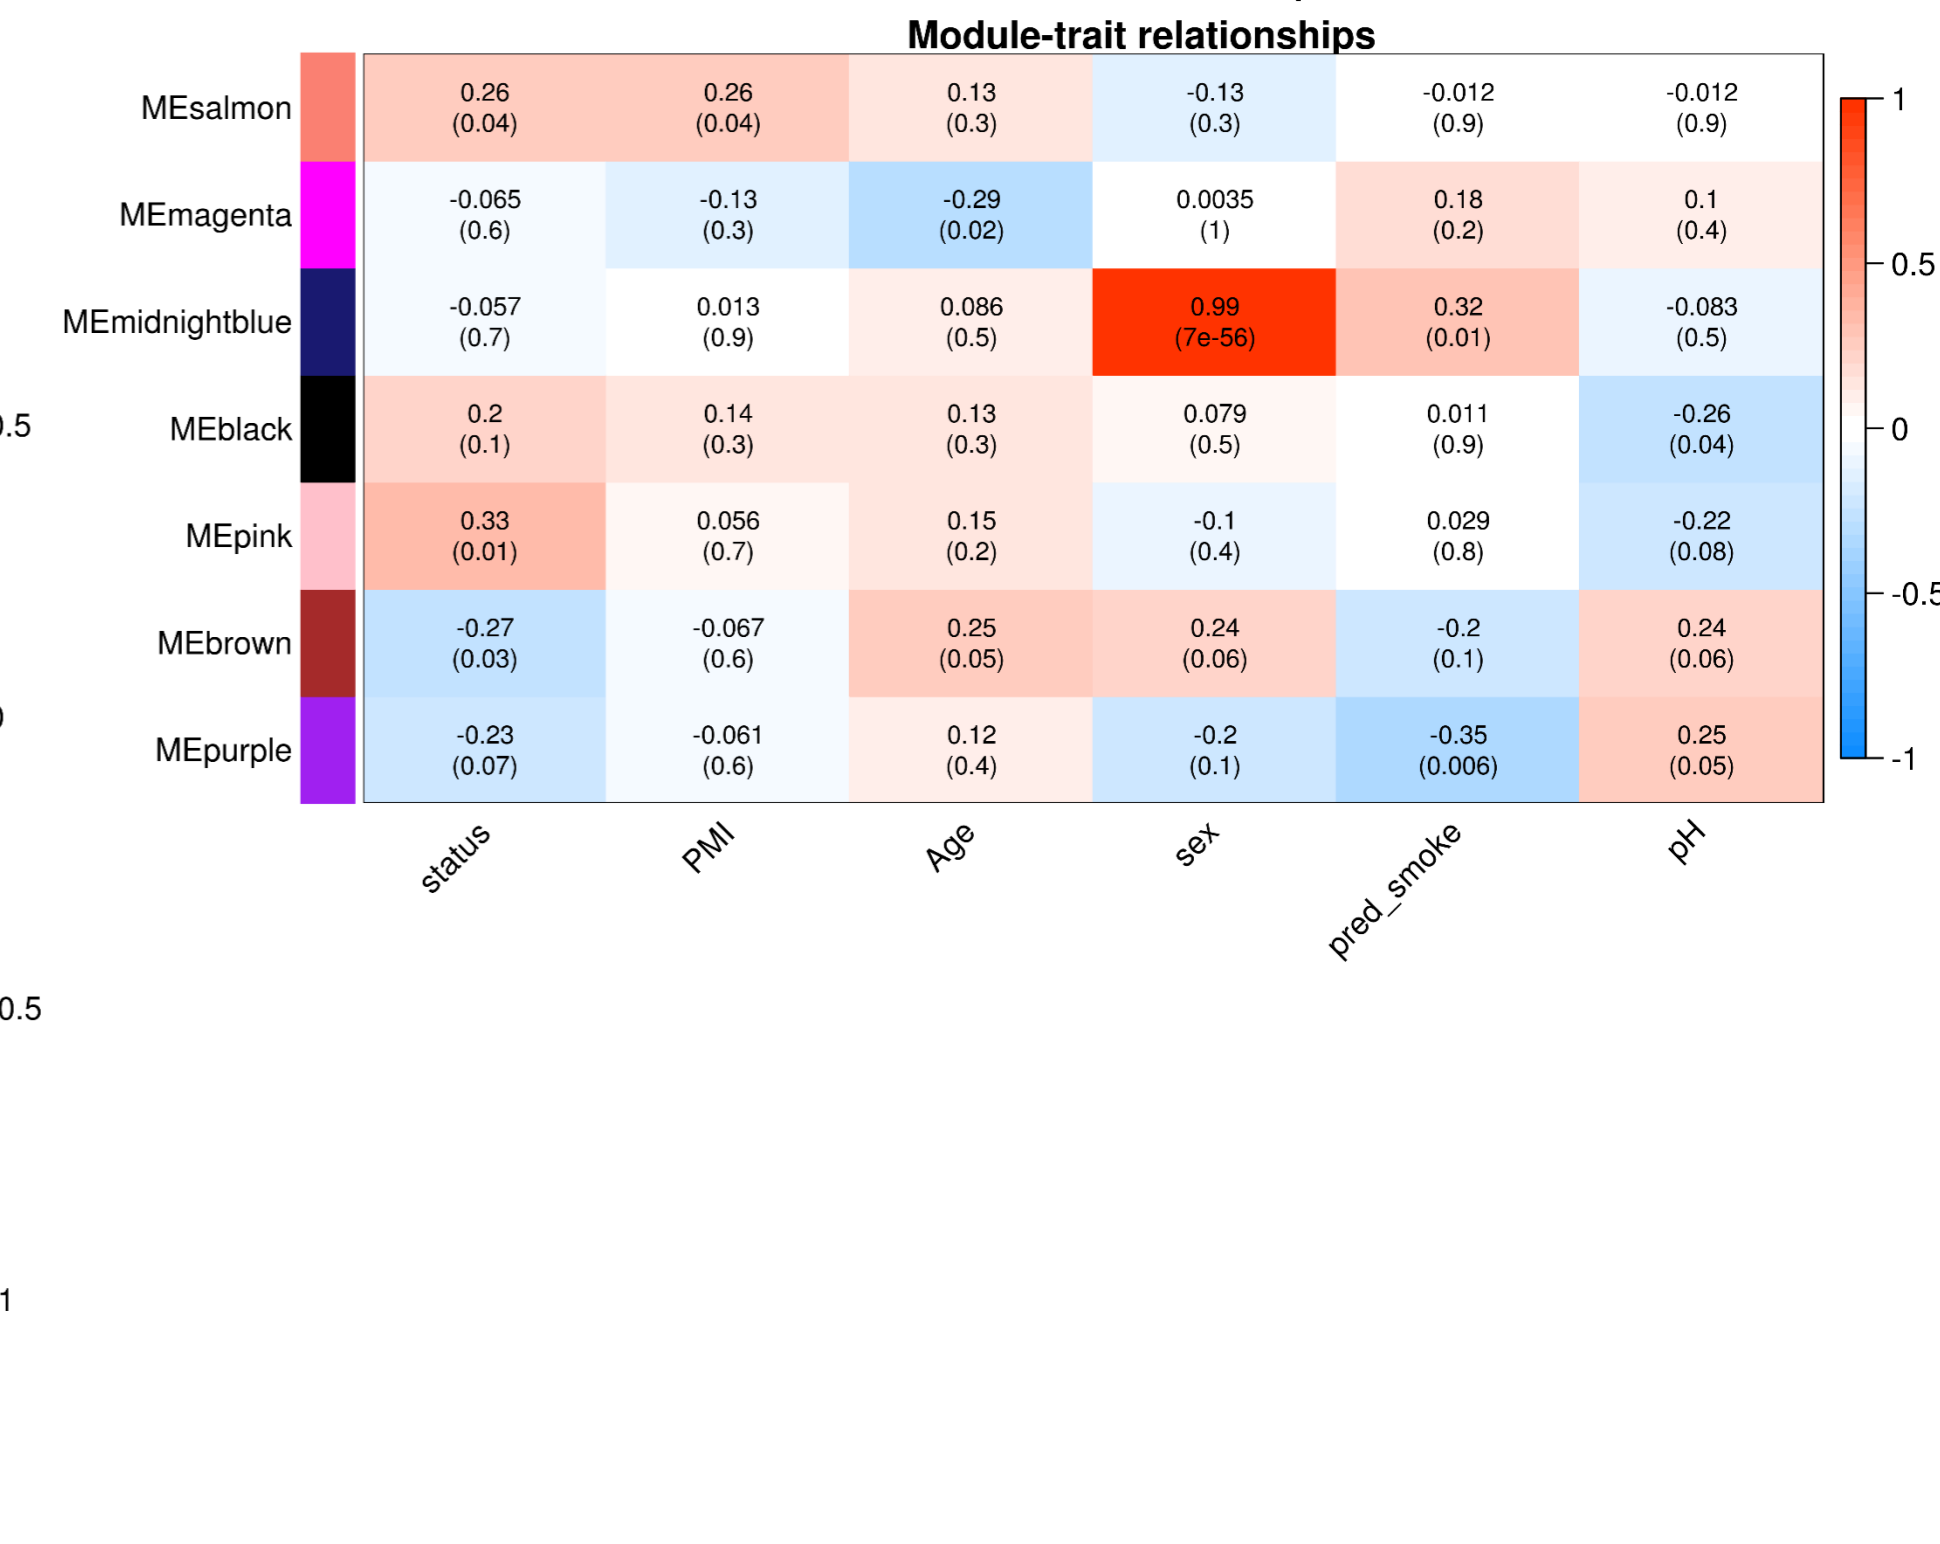

A.2 Caudate Nucleus - Methylation

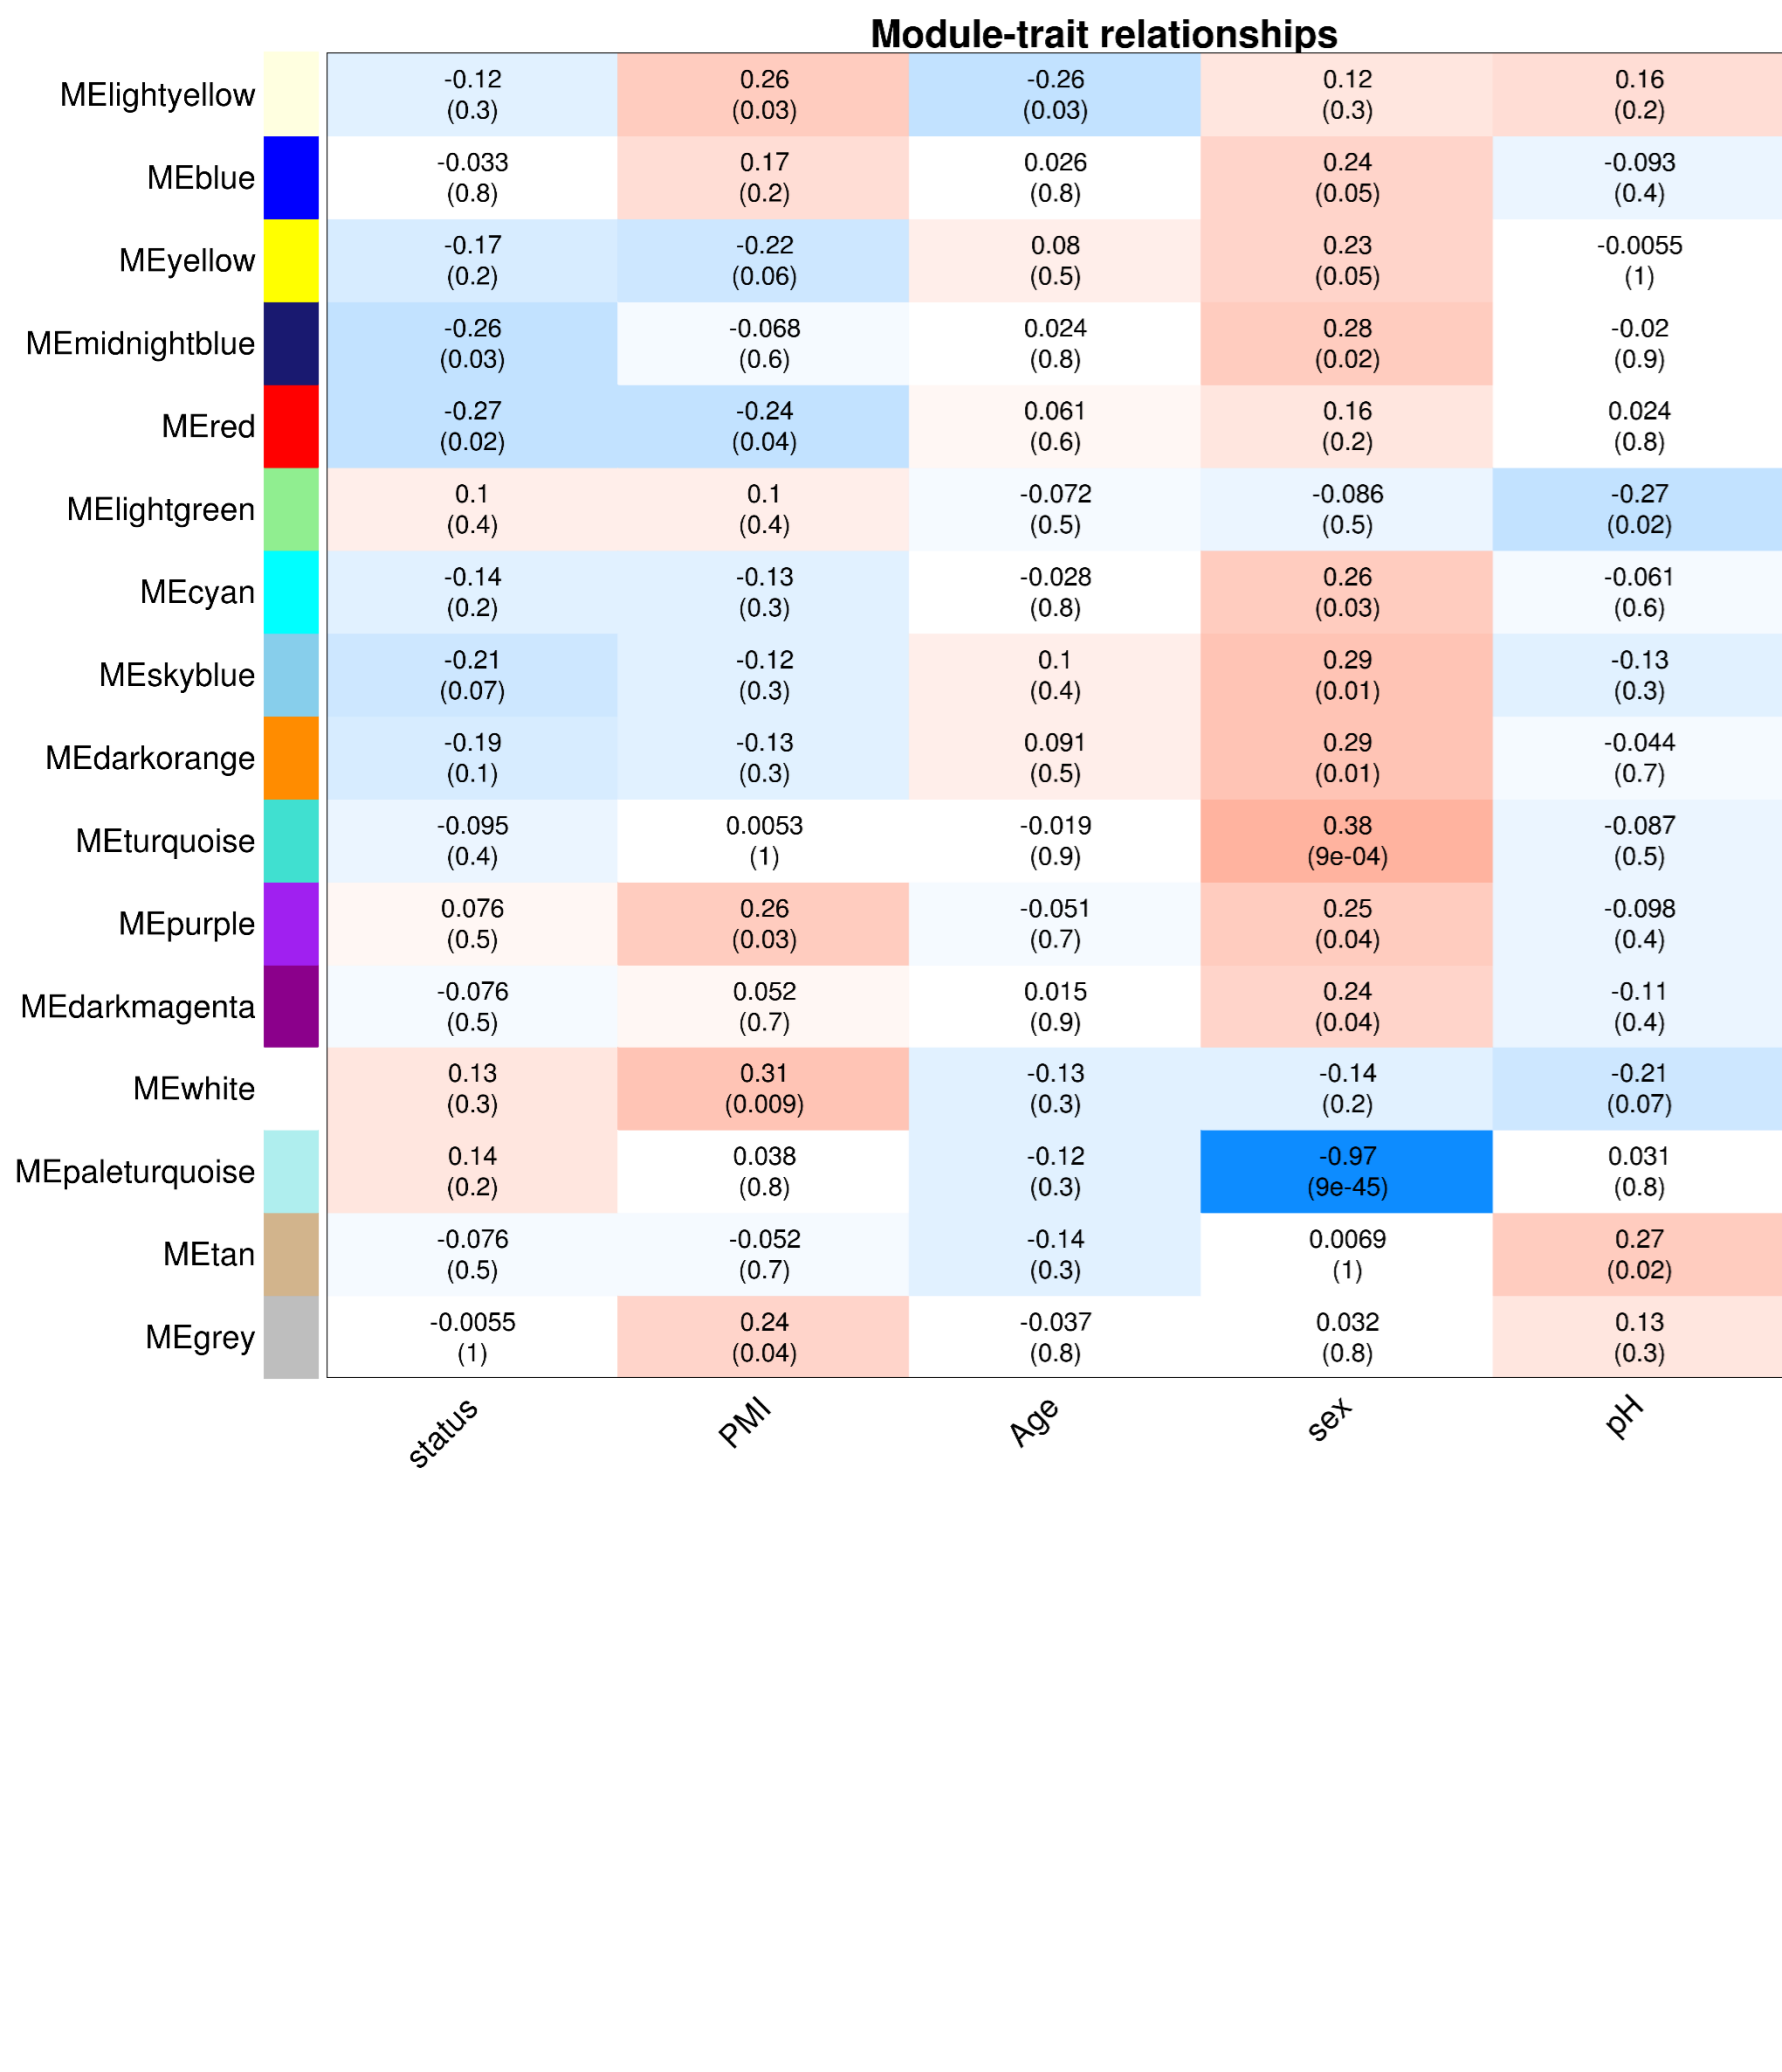

B.2 Putamen - Methylation

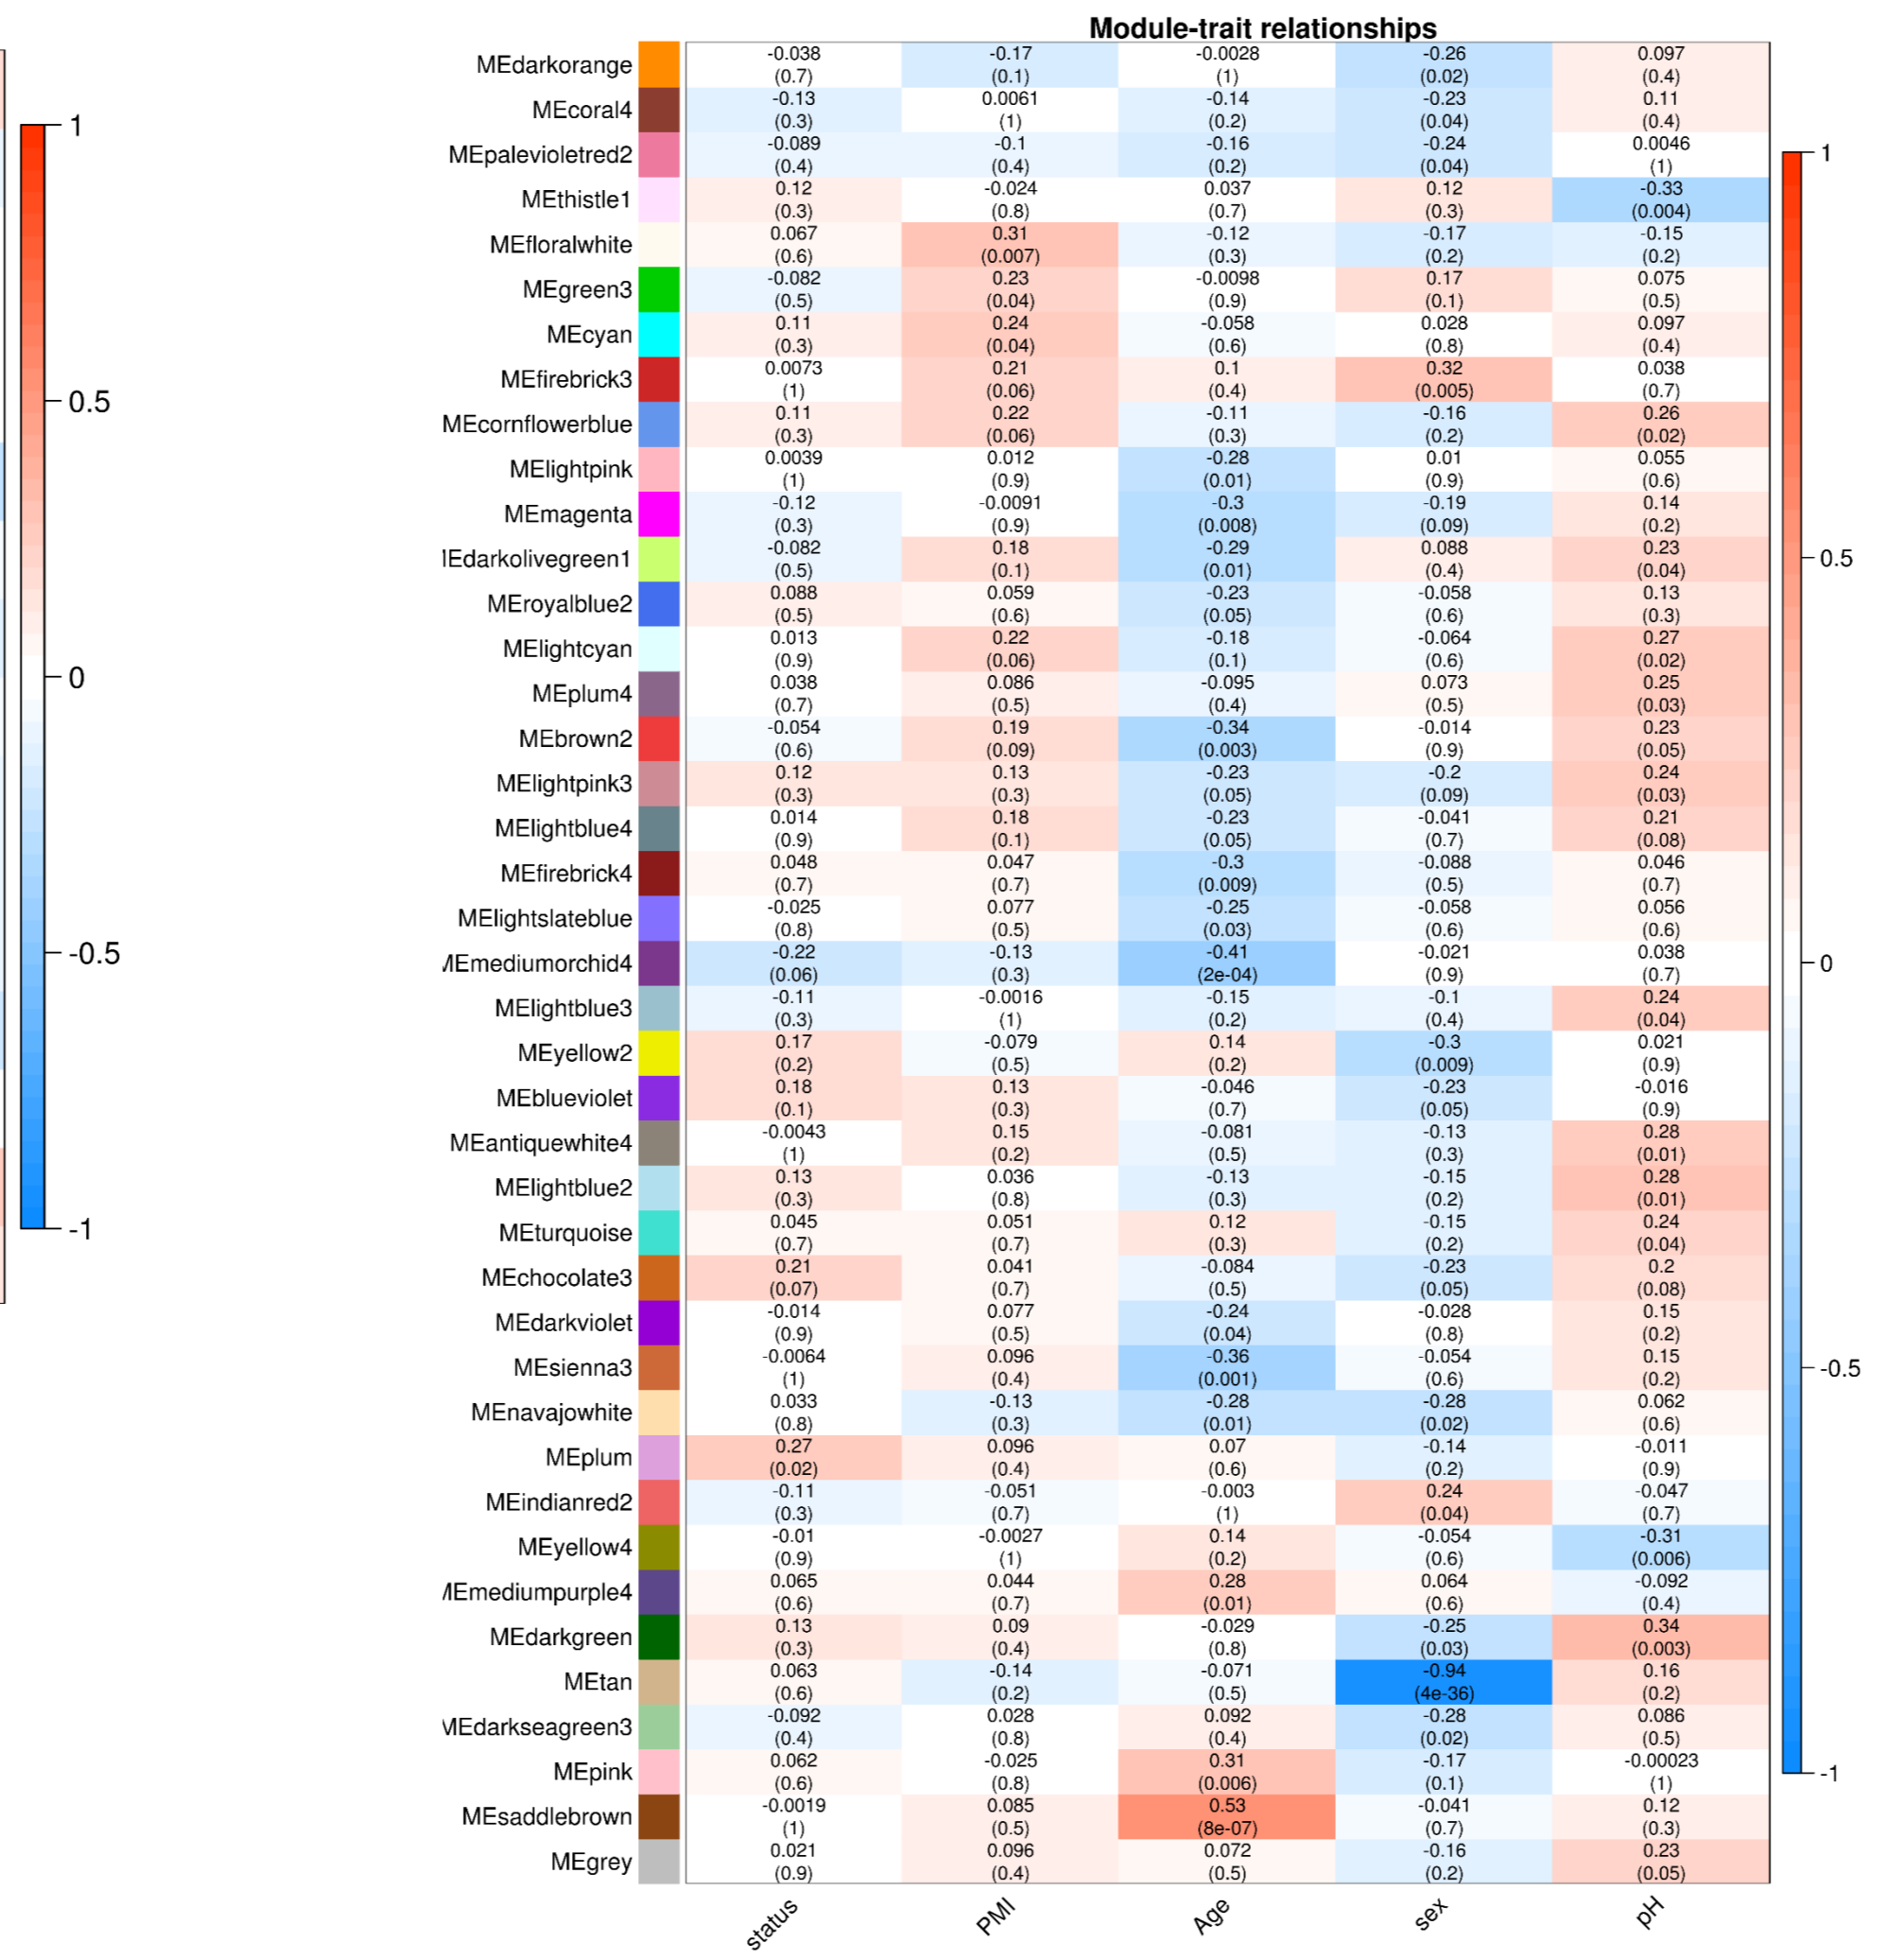

C.2 Ventral Striatum - Methylation

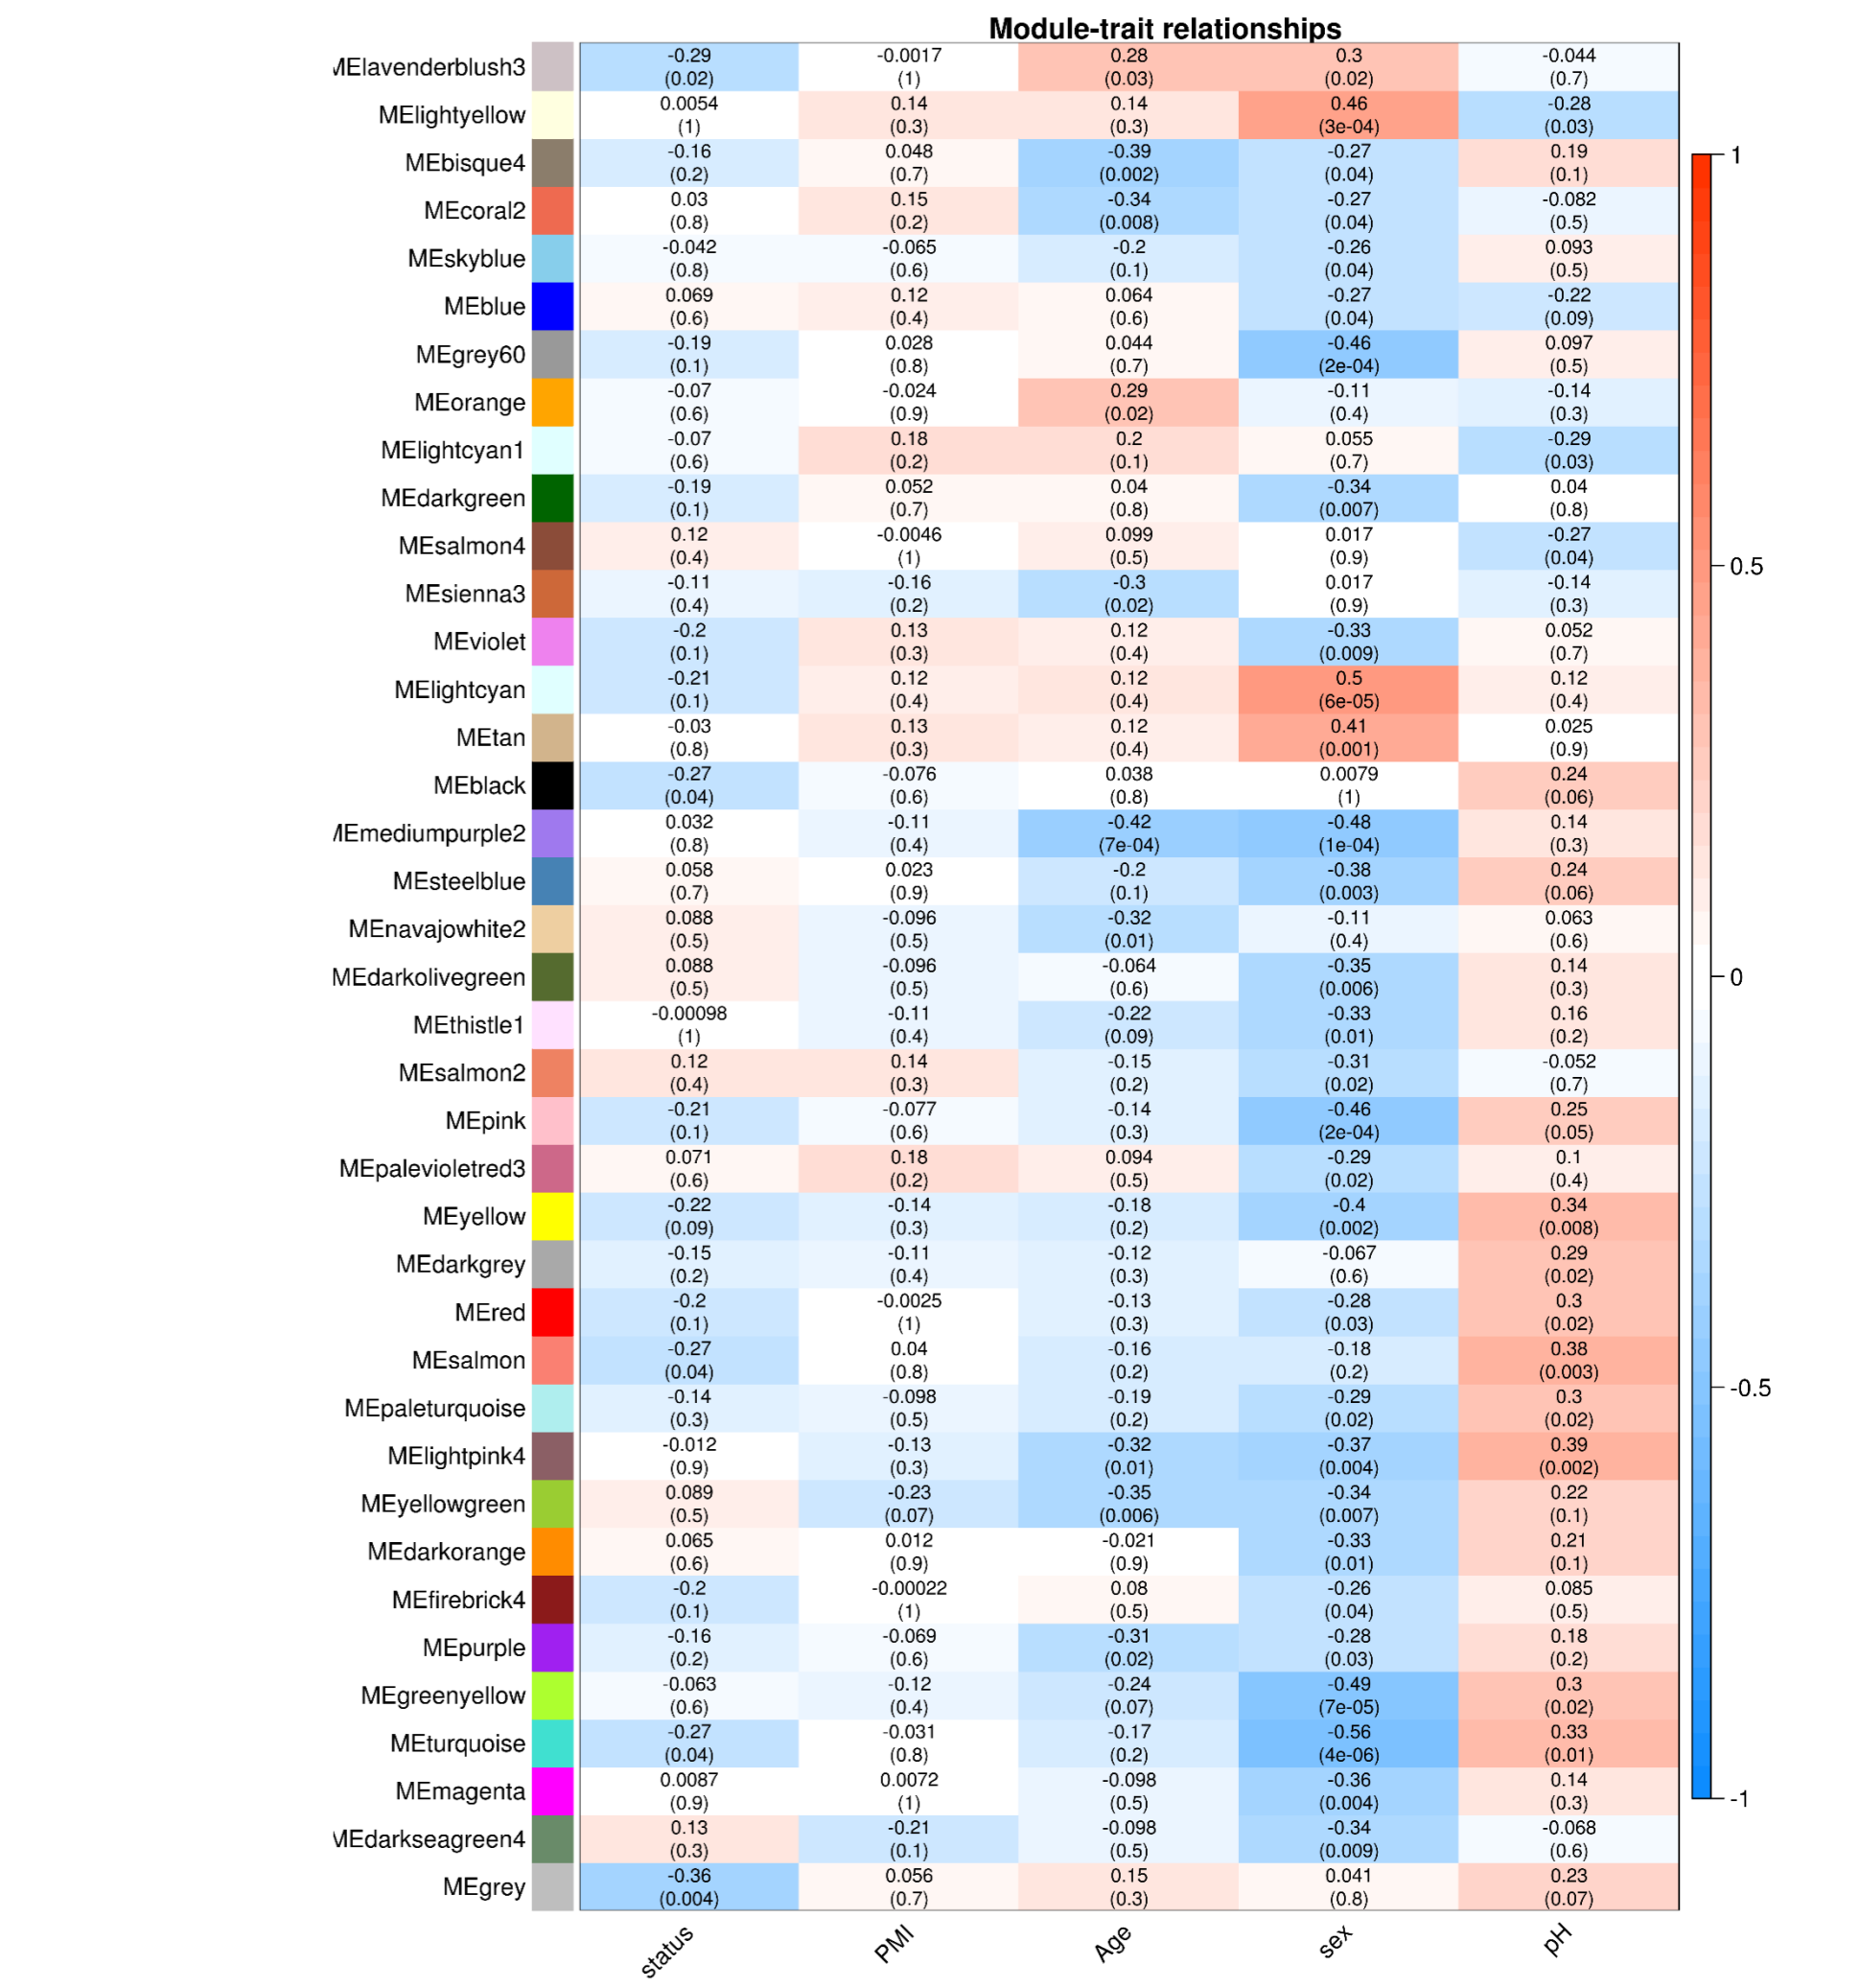

Supplement: 41398_2022_1959_MOESM5_ESM.pdf [file 41398_2022_1959_MOESM5_ESM.pdf]
