# Supplementary material for: Multi-omics signatures of alcohol use disorder in the dorsal and ventral striatum
Source: PubMed Central journal article supplement (PMC9076849; doi:10.1038/s41398-022-01959-1), 2022-05-06
Supplement: 41398_2022_1959_MOESM6_ESM.pdf [file 41398_2022_1959_MOESM6_ESM.pdf]

**A**

## Caudate nucleus

|       |       |                  |
|-------|-------|------------------|
| 7e-06 | N.S.  | Astrocyte        |
| N.S.  | 2e-07 | Endothelial_Cell |
| N.S.  | N.S.  | Microglia        |
| N.S.  | N.S.  | Neuron           |
| N.S.  | N.S.  | Oligodendrocyte  |

upregulated      downregulated

**B**

## Putamen

|      |      |                  |
|------|------|------------------|
| N.S. | N.S. | Astrocyte        |
| N.S. | N.S. | Endothelial_Cell |
| N.S. | N.S. | Microglia        |
| N.S. | N.S. | Neuron           |
| N.S. | N.S. | Oligodendrocyte  |

upregulated      downregulated

**C**

## Ventral Striatum

|      |      |                  |
|------|------|------------------|
| N.S. | N.S. | Astrocyte        |
| N.S. | N.S. | Endothelial_Cell |
| N.S. | N.S. | Microglia        |
| N.S. | N.S. | Neuron           |
| N.S. | N.S. | Oligodendrocyte  |

upregulated      downregulated

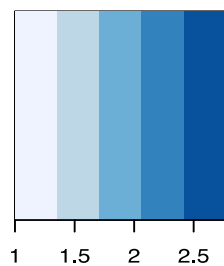

Odds Ratio
