# Supplementary material for: Multi-omics signatures of alcohol use disorder in the dorsal and ventral striatum
Source: PubMed Central journal article supplement (PMC9076849; doi:10.1038/s41398-022-01959-1), 2022-05-06

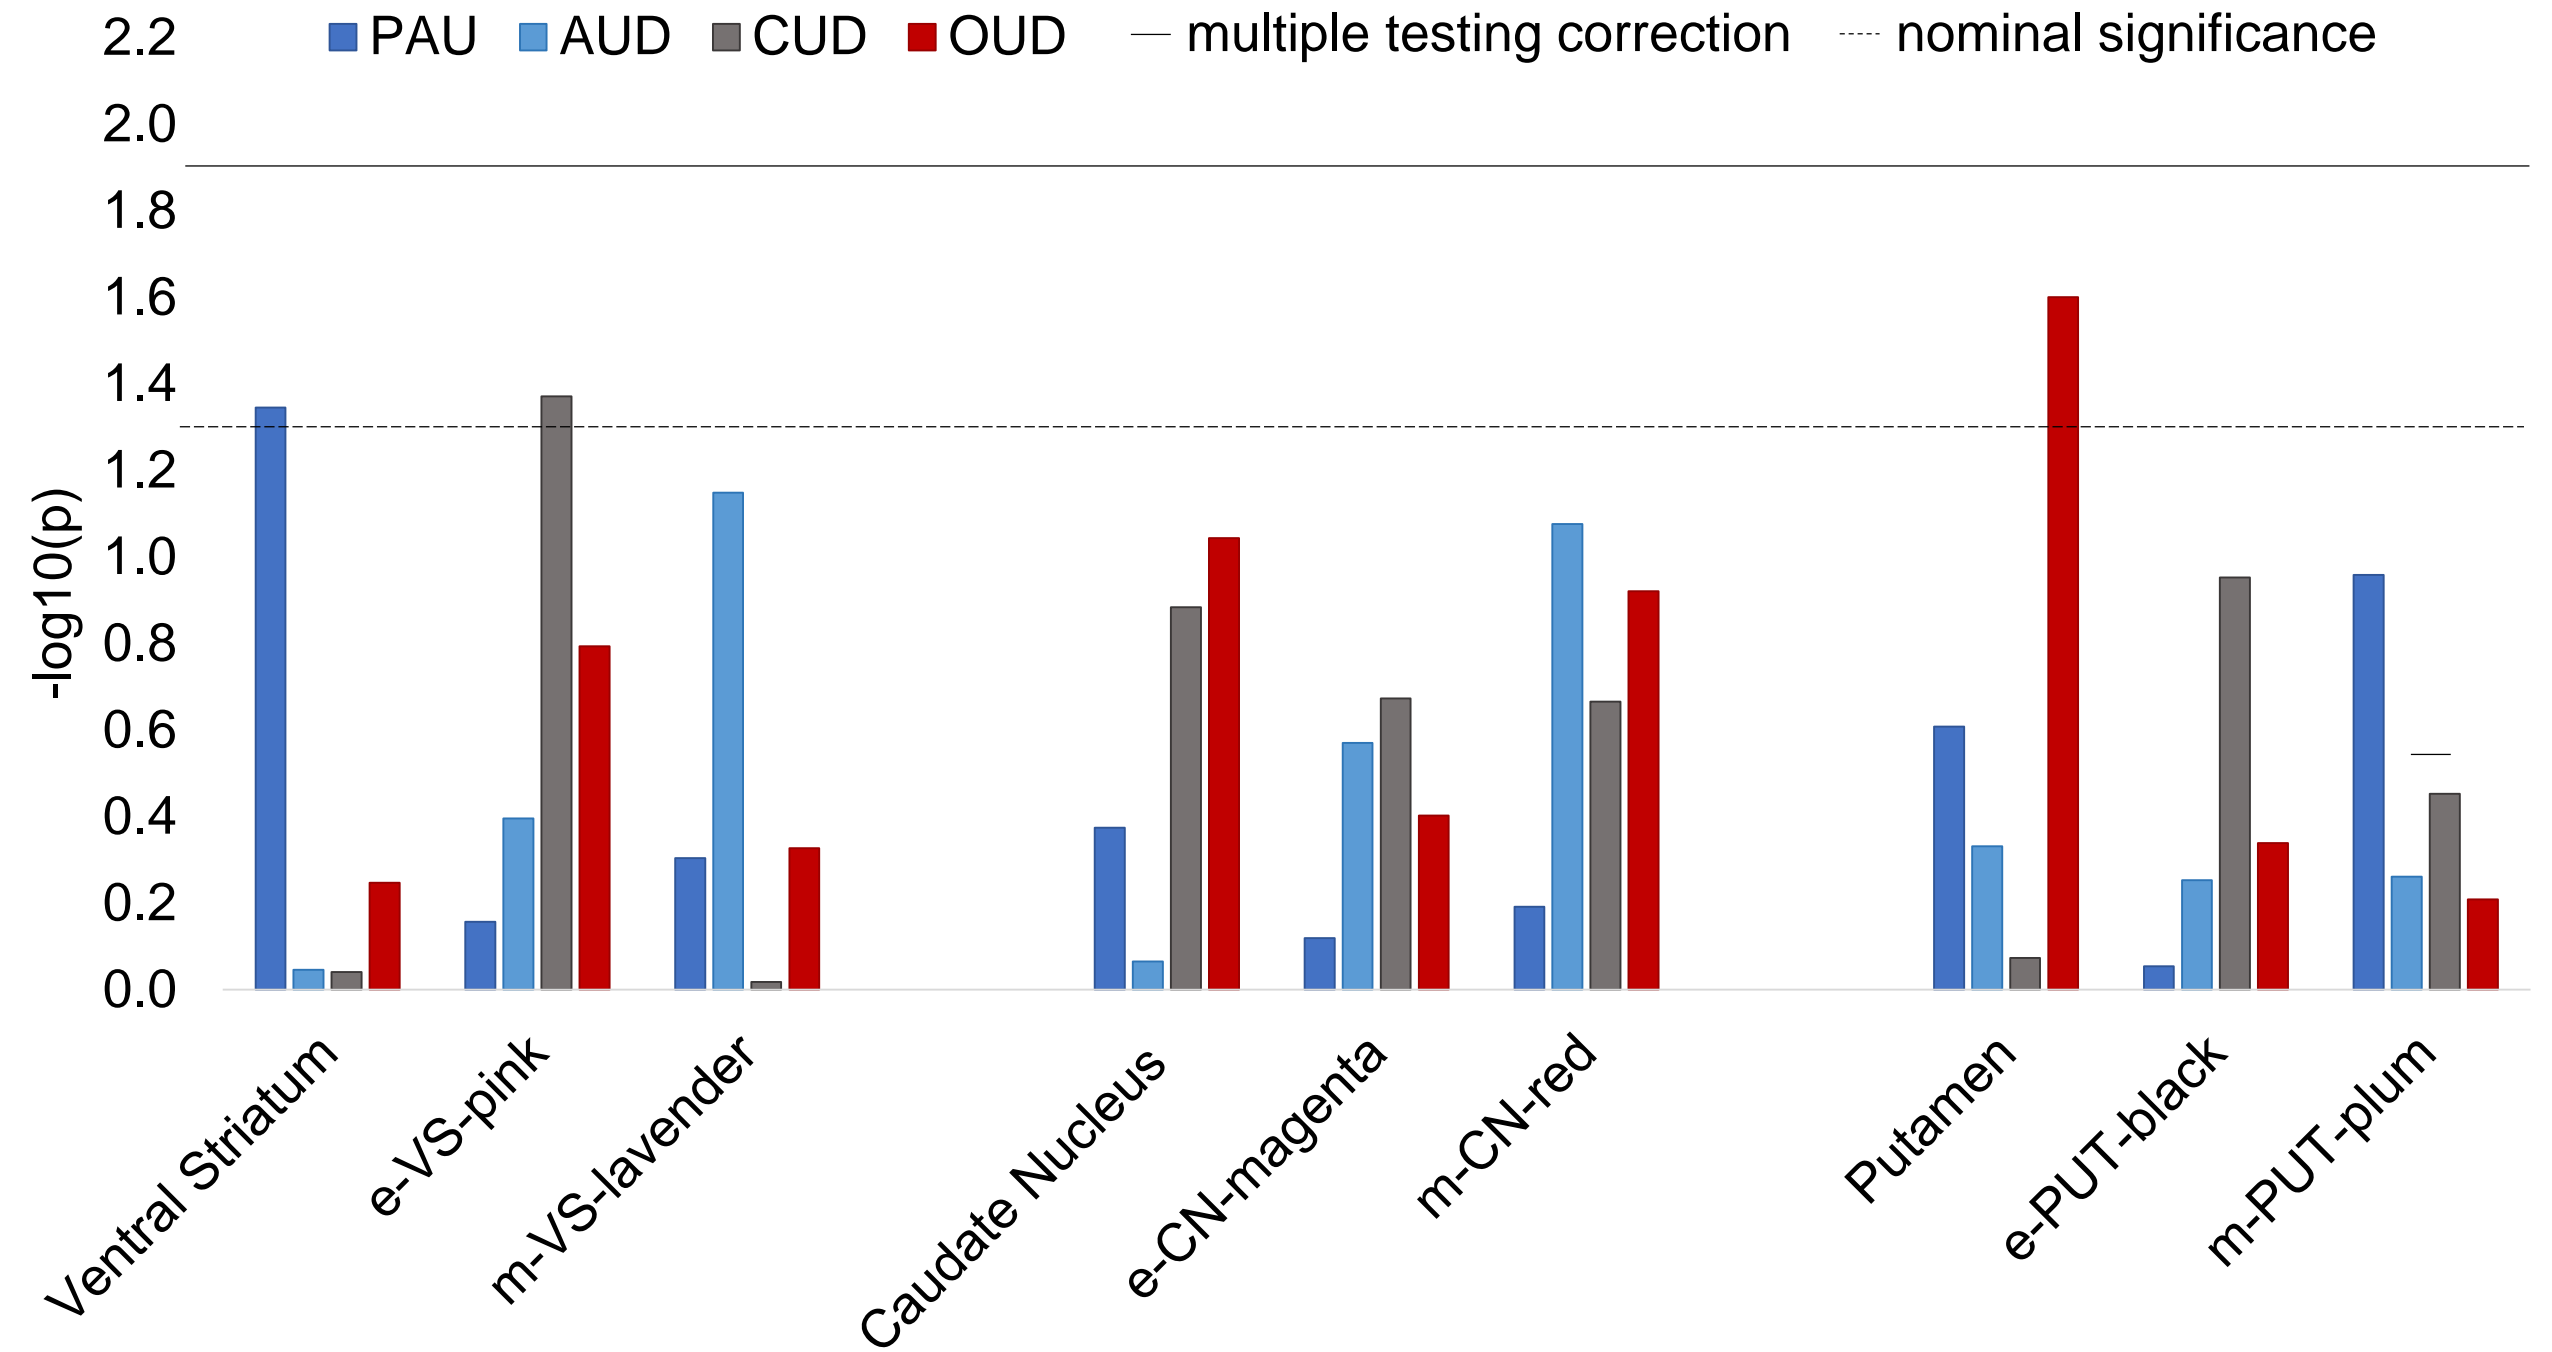

Supplement: 41398_2022_1959_MOESM7_ESM.pdf [file 41398_2022_1959_MOESM7_ESM.pdf]
